# Supplementary material
Source: Springer Nature journal article supplement (https://www.springermedizin.de/resource/supplementary/13069_2008_5_MOESM7_ESM.pdf/9659588)

# 1) Catalase

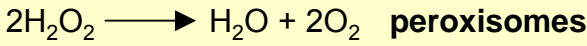

# 2) Superoxide Dismutase (SOD) isoforms

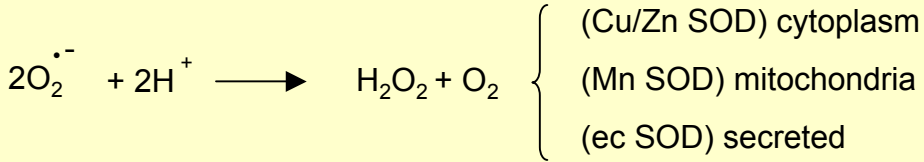

# 3) Glutathione peroxidase (GPx 1,2,3,5 isoforms)

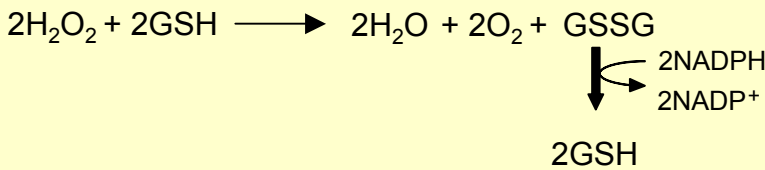

# 4) Phospholipid hydroperoxide GPx (GPx-G or HP-GPx)

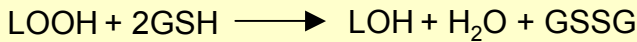

# 5) Thioredoxin (Trx)

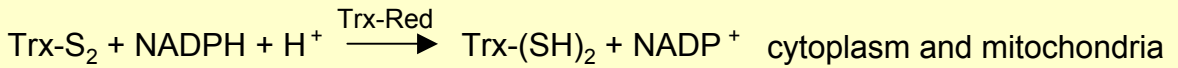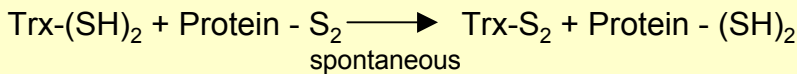

# 6) Glutaredoxin (Grx)

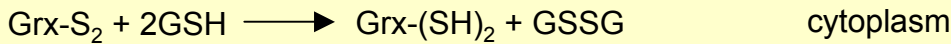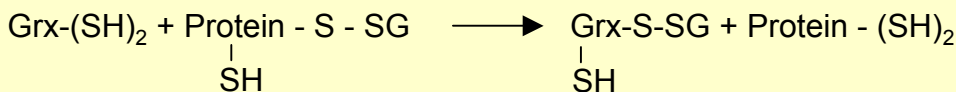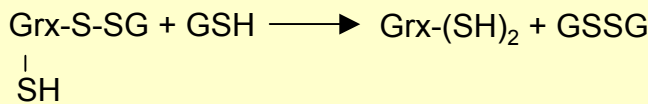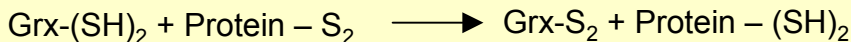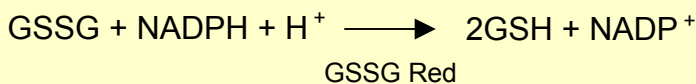

Supplement: MOESM7 [file 9659588]
